# Supplementary figures and images for: Case reports of persistent SARS-CoV-2 infection outline within-host viral evolution in immunocompromised patients
Source: PubMed Central journal article supplement — Virol J. 2024 Sep 3;21:210. doi: 10.1186/s12985-024-02483-y (PMC11373299; doi:10.1186/s12985-024-02483-y), 2024-09-03

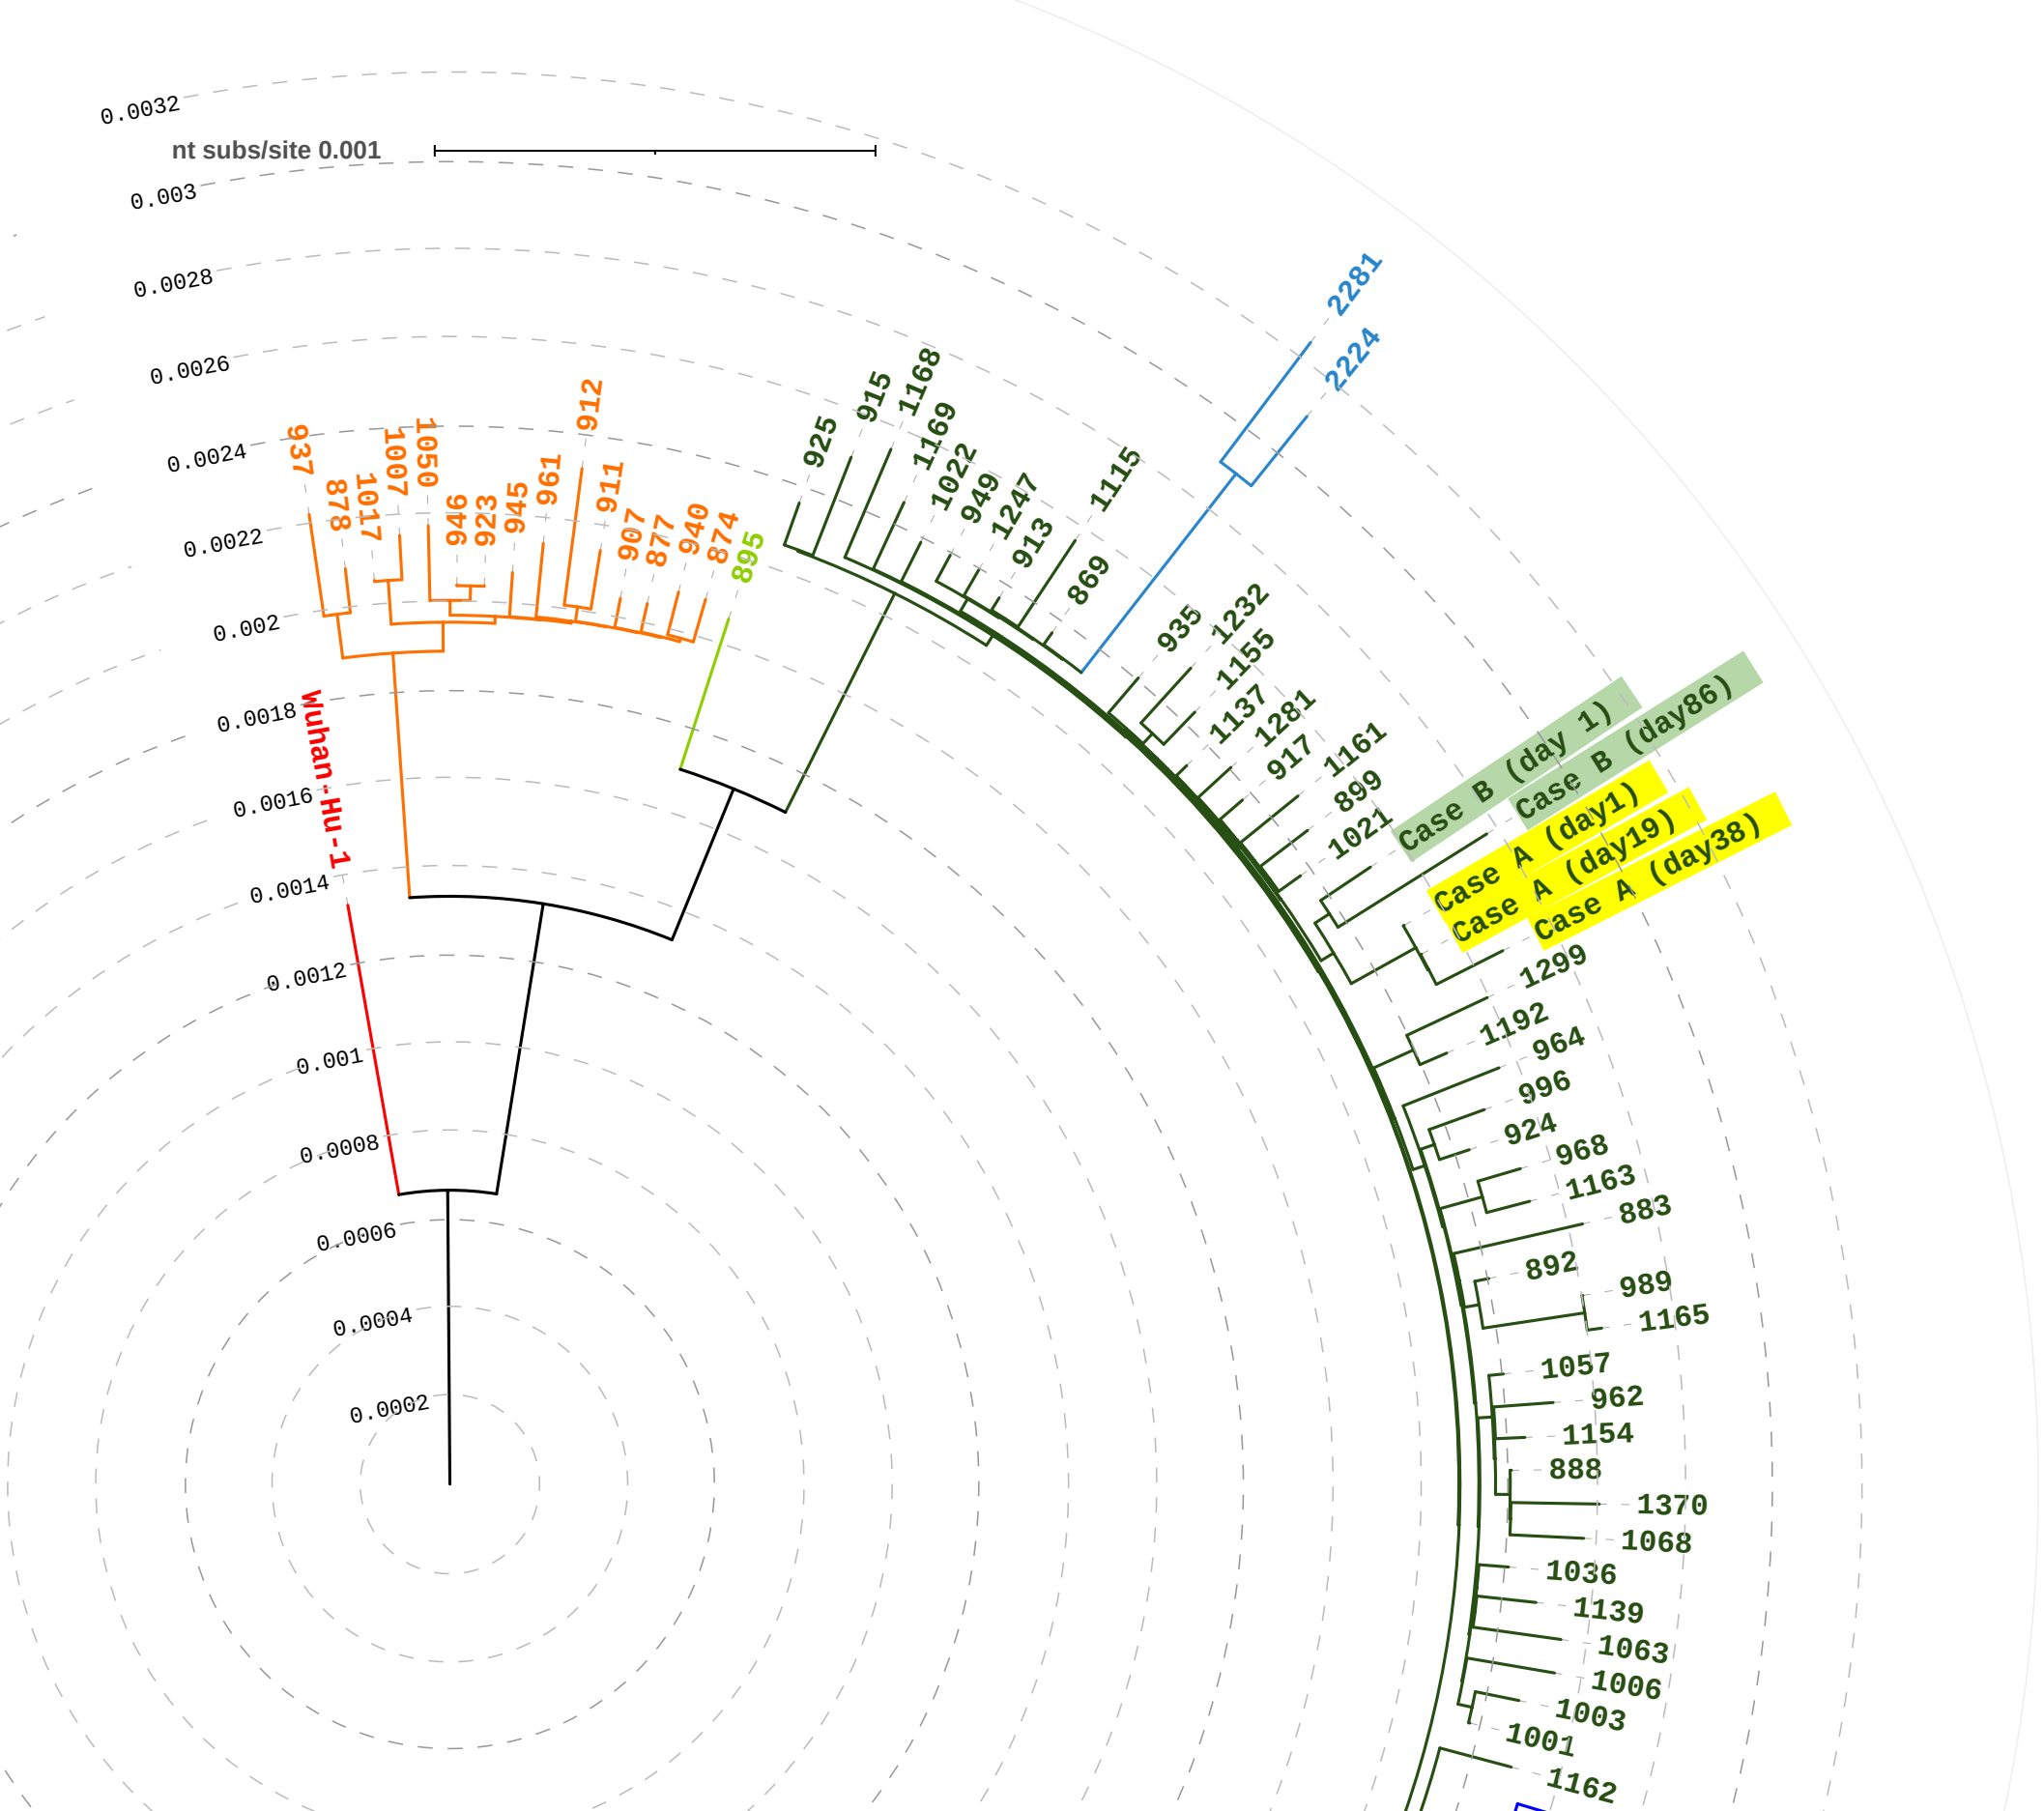

**Clades**

|                 |
|-----------------|
| 19A (NC_045512) |
| 21K (BA.1)      |
| 21L (BA.2)      |
| 21M (BA.3)      |
| 22D (BA.2.75)   |
| 22A (BA.4)      |
| 22B (BA.5)      |
| 22E (BQ.1)      |

Supplement: 12985_2024_2483_MOESM7_ESM.pdf [file 12985_2024_2483_MOESM7_ESM.pdf]
